# Supplementary material for: Exploring Attitudes and Needs for Digital Supportive Care in Patients with Cancer and Survivors
Source: Research Square preprint supplement (doi:10.21203/rs.3.rs-5791593/v1), 2025-01-15
Supplement: Supplementary file 1 [file c656d3a7f133b49bd115a9c9.pdf]

1 **Supplementary material 1. Interview guide**

2 **Introduction and Presentation of the Study**

3 First, I would like to thank you for agreeing to participate in this study. As mentioned in the  
4 information note, I would like to remind you that this discussion group or interview is being  
5 recorded to allow us to transcribe the exchanges word for word, allowing us to remain true to  
6 your statements during analysis. The recording will be deleted as soon as the transcription is  
7 completed. Everything said during this interview will remain confidential and anonymous and  
8 will only be used for the purposes of this study.

9 I would also like to remind you that the goal of this study is to identify the facilitators of and  
10 barriers to using a digital tool aimed at reducing the impact of illness on the quality of life of  
11 patients and their families and to better understand the needs of patients and their families  
12 in relation to the use of such a tool.

13 Before we begin, do you have any questions about this interview?

14 **\*\*Start the recording\*\***

15

16 **Opening Instructions**

17 “We live in an increasingly connected society. Among the innovations we encounter daily,  
18 many applications have been developed for the general population in the field of health and  
19 well-being. However, despite these advances, the psychosocial aspects of illness are rarely  
20 addressed in such tools.

21 We would like to hear your perspective on these tools in relation to your situation. Imagine  
22 that you are offered a new tool—either a website or a mobile app—designed to help cancer  
23 patients or their families better manage their emotions after diagnosis or during treatment,  
24 provide them with information, and assist in communication with healthcare professionals.  
25 What are your thoughts on this?”

26

27 Based on participants’ responses, follow-up questions may address:

- 28
- 29 • the perceived positive or negative aspects of digital support tools
  - 30 • the perceived barriers to and facilitators of their use
  - 31 • the psychological support needs a digital support tool should address
  - 32 • the type of tools participants might need

## 1 Supplementary material 2. COREQ guidelines

2

| Item                                           | Guide Questions/Description                                                                                                                              | Reported |
|------------------------------------------------|----------------------------------------------------------------------------------------------------------------------------------------------------------|----------|
| <b>Domain 1: Research team and reflexivity</b> |                                                                                                                                                          |          |
| <b>Personal Characteristics</b>                |                                                                                                                                                          |          |
| 1. Interviewer/ facilitator                    | Which author/s conducted the interview or focus group?                                                                                                   | p. 5     |
| 2. Credentials                                 | What were the researcher's credentials? E.g., PhD, MD                                                                                                    | p. 5     |
| 3. Occupation                                  | What was their occupation at the time of the study?                                                                                                      | p. 5     |
| 4. Gender                                      | Was the researcher male or female?                                                                                                                       | p. 5     |
| 5. Experience and training                     | What experience or training did the researcher have?                                                                                                     | p. 5     |
| <b>Relationship with participants</b>          |                                                                                                                                                          |          |
| 6. Relationship established                    | Was a relationship established prior to study commencement?                                                                                              | p. 5     |
| 7. Participant knowledge of the interviewer    | What did the participants know about the researcher? e.g. personal goals, reasons for doing the research?                                                | p. 5-6   |
| 8. Interviewer characteristics                 | What characteristics were reported about the interviewer/facilitator? e.g. Bias, assumptions, reasons and interests in the research topic                | p. 5     |
| <b>Domain 2: study design</b>                  |                                                                                                                                                          |          |
| <b>Theoretical framework</b>                   |                                                                                                                                                          |          |
| 9. Methodological orientation and Theory       | What methodological orientation was stated to underpin the study? e.g. grounded theory, discourse analysis, ethnography, phenomenology, content analysis | p. 6-7   |
| <b>Participant selection</b>                   |                                                                                                                                                          |          |
| 10. Sampling                                   | How were participants selected? e.g., purposive, convenience, consecutive, snowball                                                                      | p. 5     |
| 11. Method of approach                         | How were participants approached? e.g., face-to-face, telephone, mail, email                                                                             | p. 5     |
| 12. Sample size                                | How many participants were in the study?                                                                                                                 | p. 7     |
| 13. Non-participation Setting                  | How many people refused to participate or dropped out? Reasons?                                                                                          | p. 7     |
| 14. Setting of data collection                 | Where was the data collected? e.g., home, clinic, workplace                                                                                              | p. 8     |
| 15. Presence of nonparticipants                | Was anyone else present besides the participants and researchers?                                                                                        | p. 8     |

| Item                                   | Guide Questions/Description                                                                                                      | Reported           |
|----------------------------------------|----------------------------------------------------------------------------------------------------------------------------------|--------------------|
| 16. Description of sample              | What are the important characteristics of the sample? e.g. demographic data, date                                                | p. 7-8 + Table 1   |
| <b>Data collection</b>                 |                                                                                                                                  |                    |
| 17. Interview guide                    | Were questions, prompts, and guides provided by the authors? Was it pilot tested?                                                | p. 6 + Sup. Mat. 1 |
| 18. Repeat interviews                  | Were repeat interviews carried out? If yes, how many?                                                                            | n.a.               |
| 19. Audio/visual recording             | Did the research use audio or visual recording to collect the data?                                                              | p. 6               |
| 20. Field notes                        | Were field notes made during and/or after the interview or focus group?                                                          | n.a.               |
| 21. Duration                           | What was the duration of the interviews or focus group?                                                                          | p. 8               |
| 22. Data saturation                    | Was data saturation discussed?                                                                                                   | p. 6               |
| 23. Transcripts returned               | Were transcripts returned to participants for comment and/or correction?                                                         | n.a.               |
| <b>Domain 3: analysis and findings</b> |                                                                                                                                  |                    |
| <b>Data analysis</b>                   |                                                                                                                                  |                    |
| 24. Number of data coders              | How many data coders coded the data?                                                                                             | p. 6-7             |
| 25. Description of the coding tree     | Did the authors provide a description of the coding tree?                                                                        | n.a.               |
| 26. Derivation of themes               | Were themes identified in advance or derived from the data?                                                                      | p. 7               |
| 27. Software                           | What software, if applicable, was used to manage the data?                                                                       | p. 7               |
| 28. Participant checking               | Did participants provide feedback on the findings?                                                                               | p. 18              |
| <b>Reporting</b>                       |                                                                                                                                  |                    |
| 29. Quotations presented               | Were participant quotations presented to illustrate the themes/findings? Was each quotation identified? e.g., participant number | Table 3            |
| 30. Data and findings consistent       | Was there consistency between the data presented and the findings?                                                               | p. 9-12 + Table 3  |
| 31. Clarity of major themes            | Were major themes clearly presented in the findings?                                                                             | p. 9-12            |
| 32. Clarity of minor themes            | Is there a description of diverse cases or a discussion of minor themes?                                                         | P. 9-12            |
